# Supplementary material for: Gamma-rays induced strong coupling between Ru nanoparticles and cobalt-based metal–organic framework nanolayers for methanol oxidation and hydrogen evolution
Source: Royal Society of Chemistry journal article supplement (doi:10.1039/d4nj04418e), 2024-01-01
Supplement: d4nj04418e1.pdf [file d4nj04418e1.pdf]

## Supplementary information

### **Gamma-rays induced strong coupling between Ru nanoparticle and cobalt-based metal organic framework nanolayer for methanol oxidation and hydrogen evolution**

Mengyu Hu,<sup>a</sup> Hanzhi Yu,<sup>a</sup> Chong Chen,<sup>a</sup> Yukun Zhang,<sup>a</sup> Changjiang Hu<sup>a</sup> and Jun Ma<sup>\*a, b</sup>

<sup>a</sup> College of Materials Science and Technology, Nanjing University of Aeronautics and Astronautics, Nanjing 211106, P. R. China

<sup>b</sup> School of Nuclear Science and Technology, University of Science and Technology of China, Hefei 230026, P. R. China

E-mail: majun0502@ustc.edu.cn

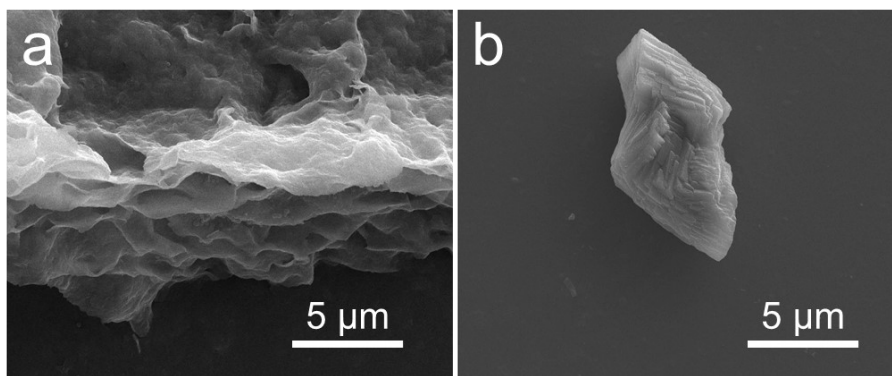

**Fig. S1** The SEM image of (a) Co MOLs, (b) bulk Co MOFs.

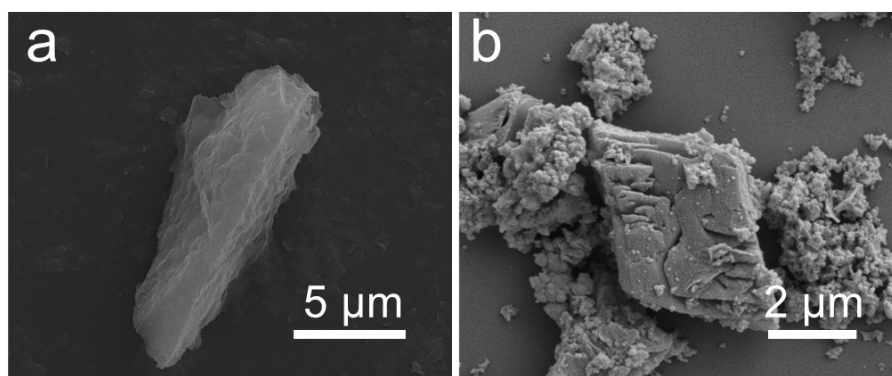

**Fig. S2** The SEM image of (a) Co MOLs-20 kGy, (b) bulk Co MOFs-20 kGy.

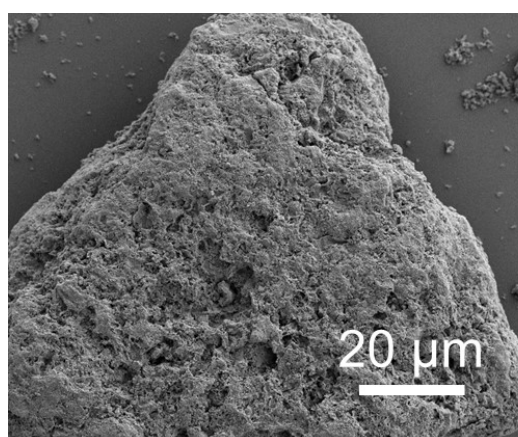

**Fig. S3** The SEM image of Ru@Co MOFs.

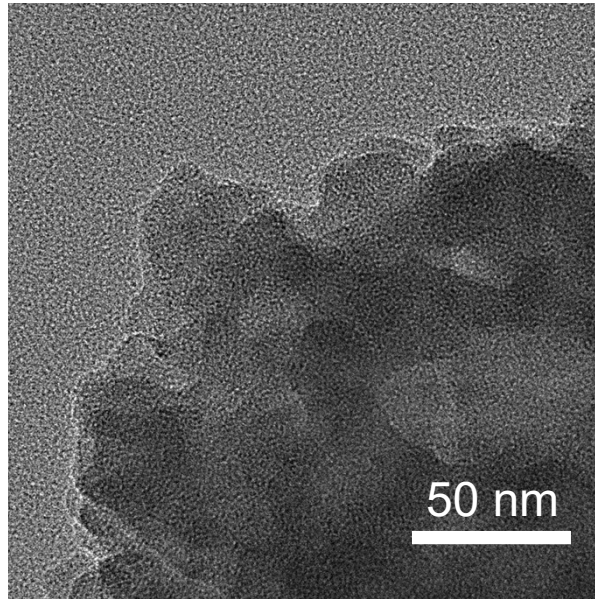

**Fig. S4** The TEM image of Ru@Co MOLs.

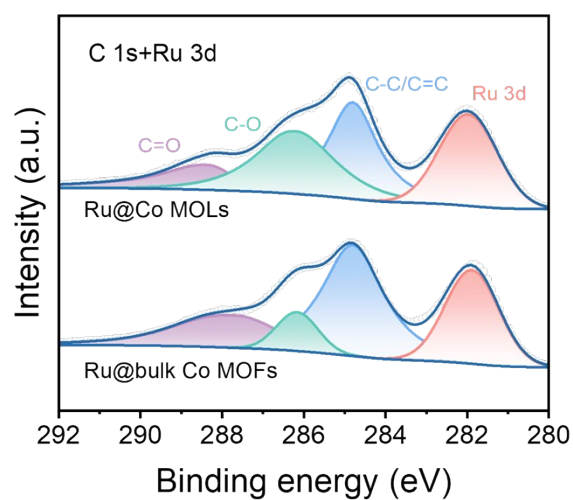

**Fig. S5** High-resolution XPS spectra of C 1s+Ru 3d for Ru@Co MOFs and Ru@Co MOFs.

In the C 1s spectrum of Ru@Co MOFs in Fig. S4, three peaks correspond to C=O (288.35 eV), C-O (286.2 eV), and C-C/C=C (284.8 eV), while the peak at 281.97 eV corresponds to the Ru 3d<sub>5/2</sub> of oxidized Ru species.

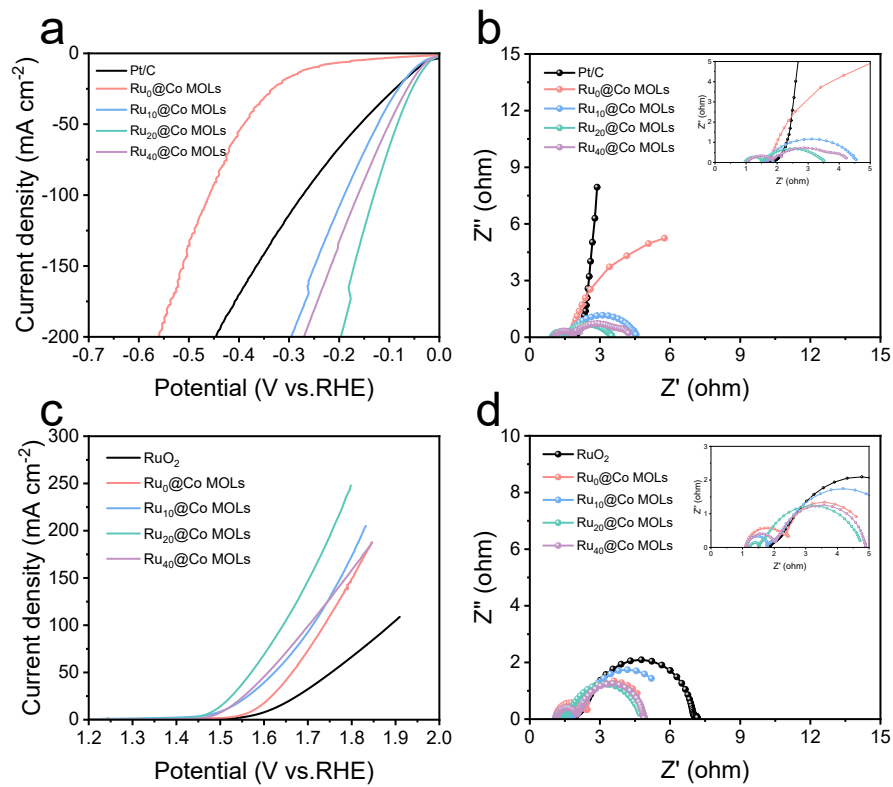

**Fig. S6** The LSV and EIS curves of HER and OER of Co MOLs and Ru@Co MOLs with different Ru loading amounts.

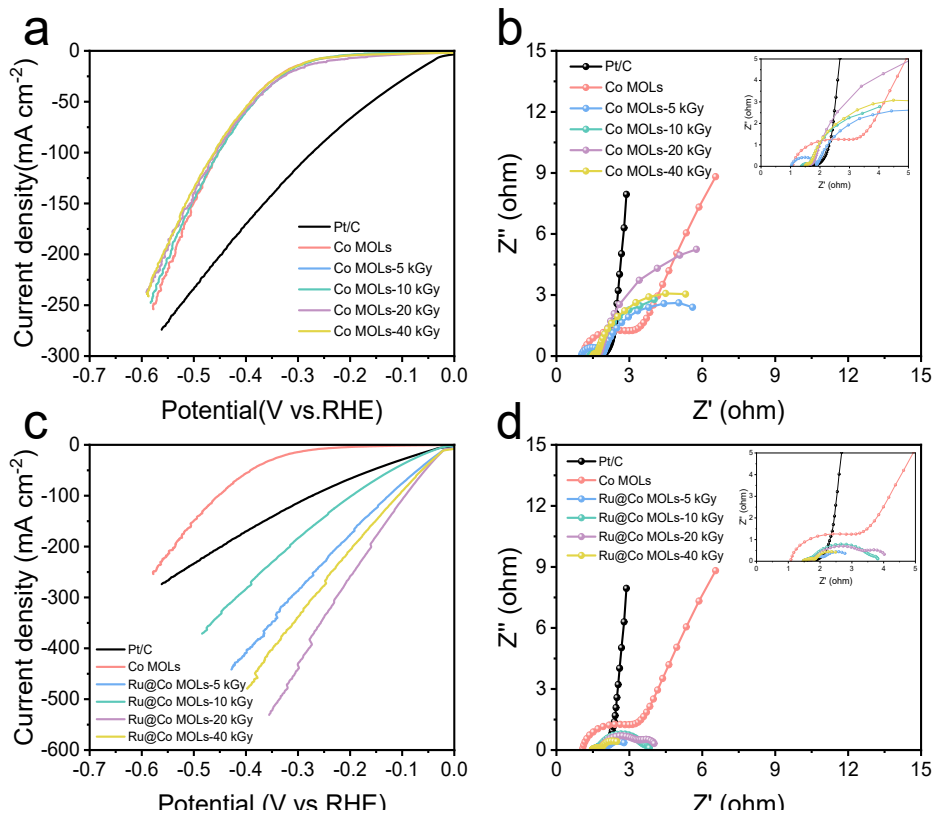

**Fig. S7** The LSV and EIS curves of Co MOLs and Ru@Co MOLs with different absorbed doses.

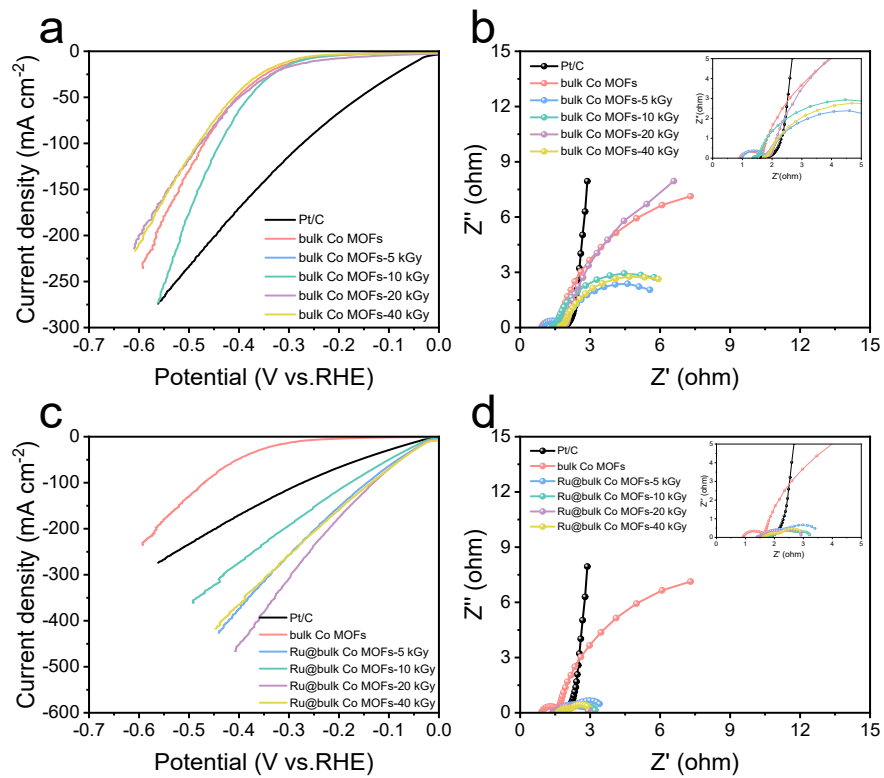

**Fig. S8** The LSV and EIS curves of bulk Co MOFs and Ru@Co MOFs with different absorbed doses.

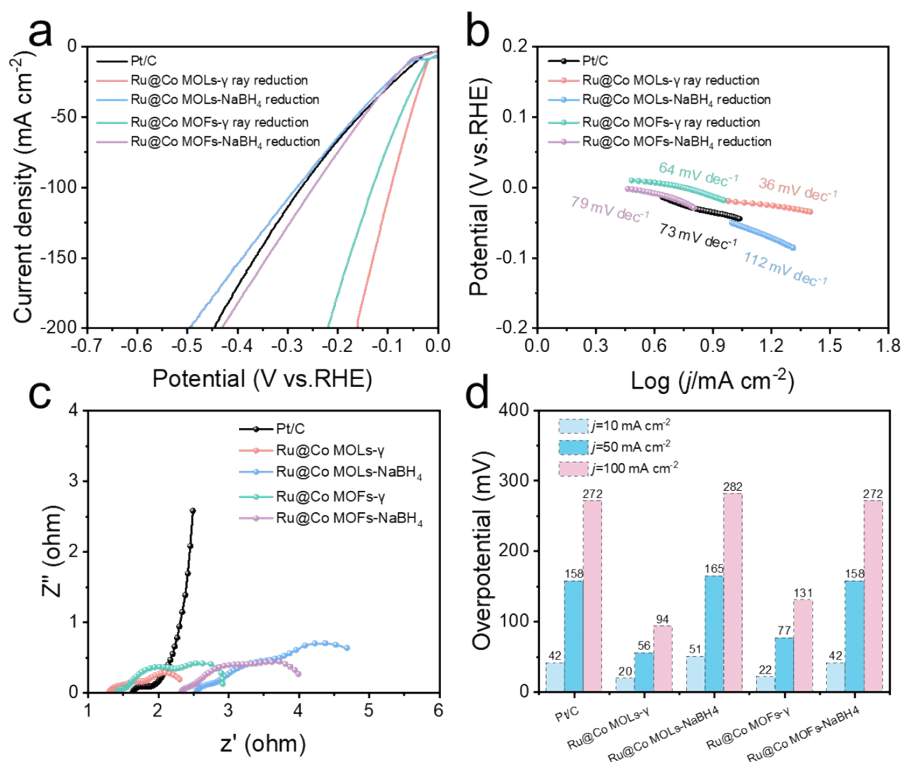

**Fig. S9** (a) The LSV curves, (b) The Tafel slope and (c) The EIS curves of Ru@Co MOLs and Ru@Co MOFs synthesized by different synthetic methods for HER. (d) The overpotential values of Ru@Co MOLs and Ru@Co MOFs synthesized by different synthesis methods at 10, 50 and 100 mA cm<sup>-2</sup>.



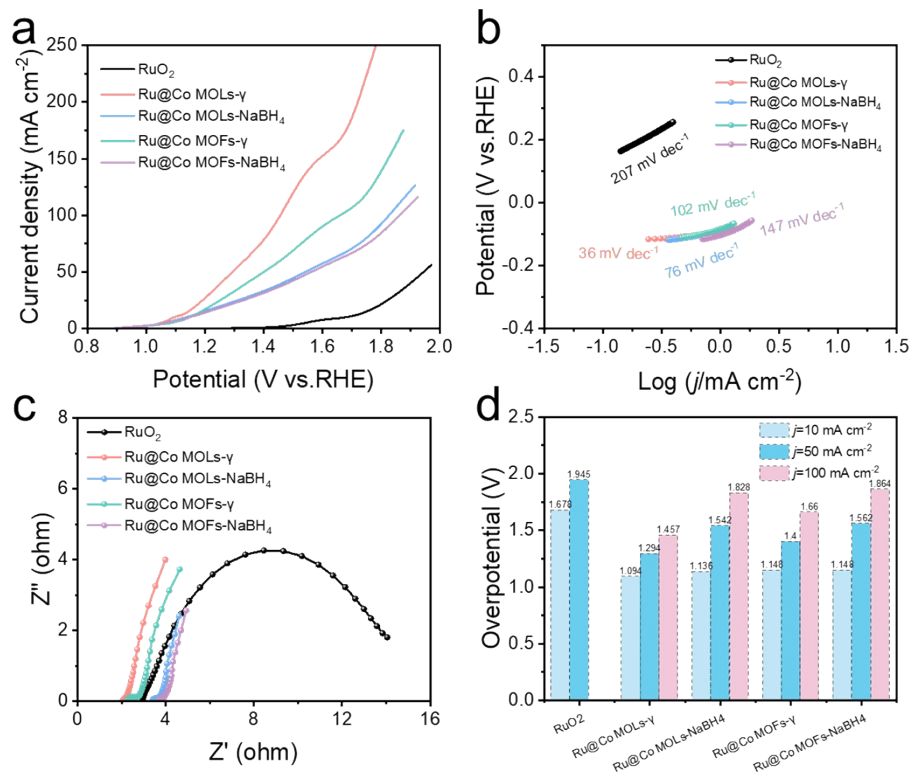

**Fig. S10** (a) The LSV curves, (b) The Tafel slope and (c) The EIS curves of Ru@Co MOLs and Ru@Co MOFs synthesized by different synthetic methods for MOR. (d) The overpotential values of Ru@Co MOLs and Ru@Co MOFs synthesized by different synthesis methods at 10, 50 and 100 mA cm<sup>-2</sup>.

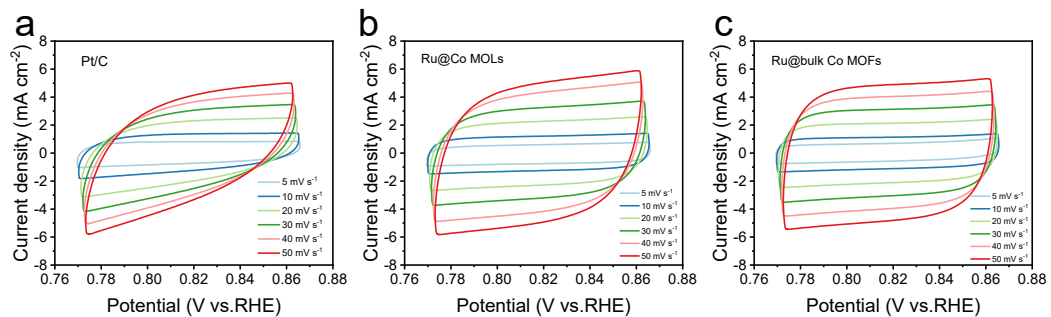

**Fig. S11** The CV curves at non-Faradaic regions with various scan rates for (a) Pt/C, (b) Ru@Co MOLs and (c) Ru@Co MOFs.

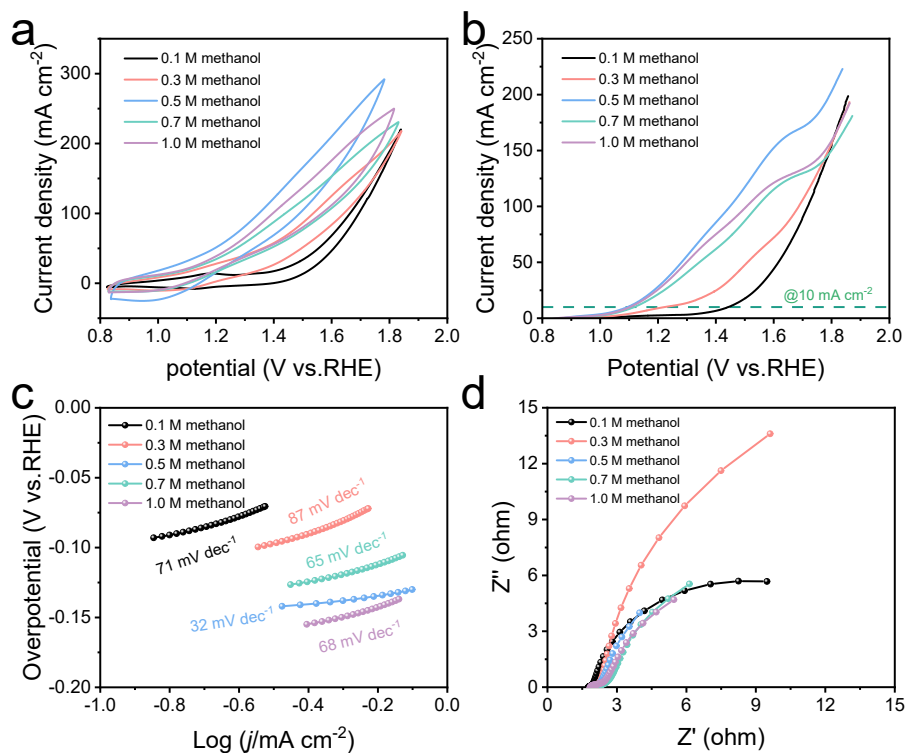

**Fig. S12** (a) The CV curves, (b) The LSV curves, (c) The Tafel slope and (d) The EIS curves of different methanol concentrations for Ru@Co MOFs.

**Table S1** Fitting results of EIS for different catalysts.

| Samples    | $R_s$ (ohm) | $R_{ct}$ (ohm) |
|------------|-------------|----------------|
| Pt/C       | 1.510       | 2.284          |
| Co MOLs    | 1.243       | 9.43           |
| Co MOFs    | 1.332       | 18.773         |
| Ru@Co MOLs | 1.315       | 1.234          |
| Ru@Co MOFs | 1.523       | 1.797          |

**Table S2.** Comparison of the HER activity for Ru@Co MOLs with other reported catalysts in alkaline electrolyte.

| Catalyst                                    | Overpotential·(mV)·<br>@10·mA·cm <sup>-2</sup> | Tafel-slope<br>(mV·dec <sup>-1</sup> ) | Reference |
|---------------------------------------------|------------------------------------------------|----------------------------------------|-----------|
| Ru@Co MOLs                                  | 20                                             | 35                                     | This work |
| Ru SAs-SnO <sub>2</sub> /C                  | 10                                             | 25                                     | 1         |
| RuCo ANSs                                   | 10                                             | 21                                     | 2         |
| β-Ni(OH) <sub>2</sub> /Ni-Ru SAs NSAs       | 16                                             | 21                                     | 3         |
| CNT-RuS <sub>x</sub>                        | 17                                             | 35                                     | 4         |
| Mo <sub>2</sub> C-Ru/C                      | 22                                             | 25                                     | 5         |
| Ru-CoP/NC                                   | 22                                             | 50                                     | 6         |
| Ru/P-TiO <sub>2</sub>                       | 27                                             | 28                                     | 7         |
| Ru/NDC-4                                    | 29                                             | 21                                     | 8         |
| Ru/MoO <sub>2-x</sub>                       | 29                                             | 22                                     | 9         |
| Ru/Co <sub>3</sub> O <sub>4</sub>           | 31                                             | 70                                     | 10        |
| Ru/Ni(OH) <sub>2</sub>                      | 31                                             | 30                                     | 11        |
| Ru-CoFe <sub>2</sub> O <sub>4</sub> /NF     | 31                                             | 48                                     | 12        |
| Ru <sub>NP</sub> -Ru <sub>SA</sub> @CFN-800 | 33                                             | 37                                     | 13        |
| NiRu <sub>0.13</sub> -BDC                   | 34                                             | 32                                     | 14        |
| Ru@TiO <sub>2</sub> -V                      | 34                                             | 35                                     | 15        |
| Ru-MnFeP/NF                                 | 35                                             | 36                                     | 16        |
| V <sub>O</sub> -Ru/HfO <sub>2</sub> -OP     | 39                                             | 29                                     | 17        |
| Ru-G/CC                                     | 40                                             | 76                                     | 18        |

|                                         |     |    |    |
|-----------------------------------------|-----|----|----|
| Ru@1T-MoS <sub>2</sub> -MXene           | 44  | 47 | 19 |
| Ru-NiFe-P                               | 44  | 80 | 20 |
| (Ru-Co)O <sub>x</sub>                   | 44  | 23 | 21 |
| BPed-Ru-Gr                              | 51  | 50 | 22 |
| Ru <sub>0.10</sub> @2H-MoS <sub>2</sub> | 51  | 65 | 23 |
| Ni <sub>5</sub> P <sub>4</sub> -Ru      | 54  | 52 | 24 |
| ECM@Ru                                  | 83  | 59 | 25 |
| H-B/Ru-FeP                              | 110 | 76 | 26 |

---

**Table S3.** The cell voltage of Ru@Co MOLs|| Ru@Co MOLs methanol electrolyzer at 10 mA cm<sup>-2</sup> compared with other catalysts reported in 1 M KOH.

| Catalyst                                                    | Voltage <sub>MOR  HER</sub><br>at 10 mA cm <sup>-2</sup> | Voltage <sub>MOR  HER</sub><br>at 10 mA cm <sup>-2</sup> | Reference |
|-------------------------------------------------------------|----------------------------------------------------------|----------------------------------------------------------|-----------|
| Ru@Co MOLs                                                  | 1.54                                                     | 1.18                                                     | This work |
| NiGd@N-C/NF                                                 | 1.60                                                     | 1.34                                                     | 27        |
| Mo-Co <sub>4</sub> N                                        | 1.60                                                     | 1.43                                                     | 28        |
| NiCoSe <sub>4</sub> @NiCo-LDH                               | 1.633                                                    | 1.38                                                     | 29        |
| MoNi/DS-dNPC/NF                                             | 1.65                                                     | 1.47                                                     | 30        |
| Co(OH) <sub>2</sub> @HOS/CP                                 | 1.66                                                     | 1.50                                                     | 31        |
| Ni <sub>0.33</sub> Co <sub>0.67</sub> (OH) <sub>2</sub> /NF | 1.66                                                     | 1.50                                                     | 32        |
| MnSe/Co <sub>0.85</sub> Se@NC                               | 1.69                                                     | 1.49                                                     | 33        |
| Ni(OH) <sub>2</sub> /NF                                     | 1.70                                                     | 1.52                                                     | 34        |
| 3D Sn/NF-15                                                 | 1.76                                                     | 1.54                                                     | 35        |

## References:

1. J. Zhang, G. Chen, Q. Liu, C. Fan, D. Sun, Y. Tang, H. Sun and X. Feng, *Angewandte Chemie International Edition*, 2022, **61**, e202209486.
2. C. Cai, K. Liu, Y. Zhu, P. Li, Q. Wang, B. Liu, S. Chen, H. Li, L. Zhu and H. Li, *Angewandte Chemie*, 2022, **134**, e202113664.
3. P. Yan, T. Yang, M. Lin, Y. Guo, Z. Qi, Q. Luo and X.-Y. Yu, *Advanced Functional Materials*, 2023, **33**, 2301343.
4. C. Cheng, W. Ao, H. Ren, Z. Shen, Z. Fan, T. Xu, W. Liu, Q. Zhang, P. Yin and L. Dai, *Applied Catalysis B: Environmental*, 2023, **331**, 122681.
5. R. Tang, Y. Yang, Y. Zhou and X.-Y. Yu, *Advanced Functional Materials*, 2024, **34**, 2301925.
6. Y.-R. Hao, H. Xue, J. Sun, N. Guo, T. Song, J. Sun and Q. Wang, *ACS Applied Materials & Interfaces*, 2021, **13**, 56035-56044.
7. Z. Zhou, J. Zhang, S. Mukherjee, S. Hou, R. Khare, M. Döblinger, O. Tomanec, M. Otyepka, M. Koch, P. Gao, L. Zhou, W. Li and R. A. Fischer, *Chemical Engineering Journal*, 2022, **449**, 137888.
8. J.-T. Ren, L. Chen, H.-Y. Wang, W.-W. Tian, X. Zhang, T.-Y. Ma, Z. Zhou and Z.-Y. Yuan, *Applied Catalysis B: Environmental*, 2023, **327**, 122466.
9. C. Li, H. Jang, M. G. Kim, L. Hou, X. Liu and J. Cho, *Applied Catalysis B: Environment and Energy*, 2022, **307**, 121204.
10. Z. Liu, L. Zeng, J. Yu, L. Yang, J. Zhang, X. Zhang, F. Han, L. Zhao, X. Li, H. Liu and W. Zhou, *Nano Energy*, 2021, **85**, 105940.
11. W. Ao, C. Cheng, H. Ren, Z. Fan, P. Yin, Q. Qin, Z.-N. Chen and L. Dai, *ACS Applied Materials & Interfaces*, 2022, **14**, 45042-45050.
12. Y.-T. Zeng, M.-Y. Xu, T. Wang, S.-Y. Wu, J. Zhang, S.-C. Mu and J. Yu, *Electrochimica Acta*, 2023, **444**, 142004.
13. T. Luo, J. Huang, Y. Hu, C. Yuan, J. Chen, L. Cao, K. Kajiyoshi, Y. Liu, Y. Zhao, Z. Li and Y. Feng, *Advanced Functional Materials*, 2023, **33**, 2213058.
14. Y. Sun, Z. Xue, Q. Liu, Y. Jia, Y. Li, K. Liu, Y. Lin, M. Liu, G. Li and C.-Y. Su, *Nature Communications*, 2021, **12**, 1369.
15. H. Gai, X. Liu, B. Feng, C. Gai, T. Huang, M. Xiao and H. Song, *Chemical Engineering Journal*, 2021, **407**, 127082.
16. D. Chen, Z. Pu, R. Lu, P. Ji, P. Wang, J. Zhu, C. Lin, H.-W. Li, X. Zhou, Z. Hu, F. Xia, J. Wu and S. Mu, *Advanced Energy Materials*, 2020, **10**, 2000814.
17. G. Li, H. Jang, S. Liu, Z. Li, M. G. Kim, Q. Qin, X. Liu and J. Cho, *Nature Communications*, 2022, **13**, 1270.
18. M. You, X. Du, X. Hou, Z. Wang, Y. Zhou, H. Ji, L. Zhang, Z. Zhang, S. Yi and D. Chen, *Applied Catalysis B: Environmental*, 2022, **317**, 121729.
19. G. Li, T. Sun, H.-J. Niu, Y. Yan, T. Liu, S. Jiang, Q. Yang, W. Zhou and L. Guo, *Advanced Functional Materials*, 2023, **33**, 2212514.
20. M. Qu, Y. Jiang, M. Yang, S. Liu, Q. Guo, W. Shen, M. Li and R. He, *Applied Catalysis B: Environmental*, 2020, **263**, 118324.
21. C. Wang and L. Qi, *Angewandte Chemie International Edition*, 2020, **59**, 17219-17224.
22. H. Yang, X. Wang, S. Xia, S. Zhang, R. Zhang, X. Li, X.-F. Yu, X. Zhang and L. Bai, *Advanced*



- Energy Materials*, 2023, **13**, 2302727.
23. J. Chen, M. Zhang, J. Shu, M. Yuan, W. Yan, P. Bai, L. He, N. Shen, S. Gong, D. Zhang, J. Li, J. Hu, R. Li, G. Wu, Z. Chai, J. Yu and S. Wang, *Angewandte Chemie International Edition*, 2021, **60**, 14858-14863.
  24. Q. He, D. Tian, H. Jiang, D. Cao, S. Wei, D. Liu, P. Song, Y. Lin and L. Song, *Advanced Materials*, 2020, **32**, 1906972.
  25. H. Zhang, W. Zhou, X. F. Lu, T. Chen and X. W. Lou, *Advanced Energy Materials*, 2020, **10**, 2000882.
  26. Z. Wang, Y. Wang, W. Xiao, X. Wang, Y. Fu, G. Xu, Z. Li, Z. Wu and L. Wang, *Journal of Materials Chemistry A*, 2022, **10**, 15155-15160.
  27. Y. Xu, Q. Zhou, T. Ren, T. Liu, H. Yu, K. Deng, Z. Wang, L. Wang and H. Wang, *Journal of Materials Chemistry A*, 2023, **11**, 20112-20119.
  28. T. Wang, X. Cao, H. Qin, X. Chen, J. Li and L. Jiao, *Journal of Materials Chemistry A*, 2021, **9**, 21094-21100.
  29. J. Li, H. Yu, J. Chi, X. Luo, T. Li and Z. Shao, *Journal of Materials Chemistry A*, 2024, DOI: 10.1039/D4TA04581E.
  30. H. Fang, X. Kang, J. Zhao, J. Chen and Y. Li, *International Journal of Hydrogen Energy*, 2023, **48**, 31943-31954.
  31. K. Xiang, D. Wu, X. Deng, M. Li, S. Chen, P. Hao, X. Guo, J.-L. Luo and X.-Z. Fu, *Advanced Functional Materials*, 2020, **30**, 1909610.
  32. M. Li, X. Deng, K. Xiang, Y. Liang, B. Zhao, J. Hao, J.-L. Luo and X.-Z. Fu, *ChemSusChem*, 2020, **13**, 914-921.
  33. L. Hu, P. Zhong, J. Zhu, J. Wang, Y. Zheng, X. Lin, Y. Zhang, H. Yang, M. S. Balogun and Y. Tong, *Applied Surface Science*, 2024, **669**, 160553.
  34. J. Hao, J. Liu, D. Wu, M. Chen, Y. Liang, Q. Wang, L. Wang, X.-Z. Fu and J.-L. Luo, *Applied Catalysis B: Environmental*, 2021, **281**, 119510.
  35. A. Sajeev, K. Krishnamoorthy, P. Pazhamalai, K. Bhunia, A. Sathyaseelan and S.-J. Kim, *Journal of Materials Chemistry A*, 2023, **11**, 22419-22429.
